# Supplementary material for: Impact of Joint Commission International Patient-Centered Standards on Nursing Performance in Sana'a, Yemen Hospitals
Source: Research Square preprint supplement (doi:10.21203/rs.3.rs-6372401/v1), 2025-05-07
Supplement: Supplementary file 2 [file e9637f3e6a7f3ce523483b2d.docx]

**Study Questionnaire (English Translation)**

# **Part 1: Demographic Information**

| **No** | **Item Description** | **Response Options** |
| --- | --- | --- |
| 1 | *Hospital Type* | Government ( ) Private ( ) |
| 2 | *Hospital Name* | ________________________ |
| 3 | *Sex* | Male ( ) Female ( ) |
| 4 | *Age* | ________________________ |
| 5 | *Educational Qualification* | Diploma ( ) Bachelor’s ( ) Master’s ( ) Other ( ) |
| 6 | *Specialty* | ________________________ |
| 7 | *Graduation Year* | ________________________ |
| 8 | *Years of Service* | ________________________ |
| 9 | *Shift Type* | Day ( ) Night ( ) Rotating ( ) |
| 10 | *Job Title* | Staff Nurse ( ) Head Nurse ( ) Other ( ) |
| 11 | *Department* | Emergency ( ) Inpatient Ward ( ) ICU ( ) Neonatal Unit ( ) Other ( ) |
| 12 | *Patient Load (average per shift)* | ________________________ |
| 13 | *Employment Year at Current Hospital* | ________________________ |
| 14 | *Do you have another job?* | Yes ( ) No ( ) |
| 15 | *Marital Status* | Single ( ) Married ( ) Divorced ( ) Widowed ( ) |
| 16 | *Have you received training on JCI standards?* | Yes ( ) No ( ) |
| 17 | *If yes, specify the type of training* | ________________________ |
| 18 | *Years of Experience in Current Department* | ________________________ |
| 19 | *Have you participated in quality improvement projects?* | Yes ( ) No ( ) |
| 20 | *Average Working Hours per Week* | ________________________ |
| 21 | *Do you work overtime regularly?* | Yes ( ) No ( ) |
| 22 | *Have you received patient safety training?* | Yes ( ) No ( ) |
| 23 | *Are you a member of a professional nursing organization?* | Yes ( ) No ( ) |
| 24 | *Have you experienced a patient safety incident in the past year?* | Yes ( ) No ( ) |
| 25 | *If yes, describe briefly* | ________________________ |

# **Part 2: JCI Patient-Centered Standards and Nursing Performance**

## **Section One: JCI Standards**

| **Item No** | **Item Description** | ***7-point Likert Scale*** | | | | | | |
| --- | --- | --- | --- | --- | --- | --- | --- | --- |
| *Strongly Agree* | *Agree* | *Somewhat Agree* | *Neutral* | *Somewhat Disagree* | *Disagree* | *Strongly Disagree* |
| 7 | 6 | 5 | 4 | 3 | 2 | 1 |
| 1. **International Patient Safety Goals (IPSG)** | |  |  |  |  |  |  |  |
| M1 | Patient identity is verified using at least two methods before any procedure, excluding room or bed number. |  |  |  |  |  |  |  |
| M2 | Effective communication is ensured during patient handovers. |  |  |  |  |  |  |  |
| M3 | High-risk medications are clearly labeled to prevent errors. |  |  |  |  |  |  |  |
| M4 | Surgical site marking is consistently performed to prevent wrong-site surgery. |  |  |  |  |  |  |  |
| M5 | Time-outs are conducted before surgical procedures. |  |  |  |  |  |  |  |
| M6 | Fall risk assessments are routinely conducted for all patients. |  |  |  |  |  |  |  |
| M7 | Infection control measures (e.g., hand hygiene) are strictly followed. |  |  |  |  |  |  |  |
| M8 | Critical test results are communicated promptly to the appropriate staff. |  |  |  |  |  |  |  |
| M9 | Patient safety goals are regularly reviewed and updated. |  |  |  |  |  |  |  |
| 1. **Access to Care and Continuity (ACC)** | |  |  |  |  |  |  |  |
| M10 | Patients have timely access to care based on their needs. |  |  |  |  |  |  |  |
| M11 | Continuity of care is maintained during patient transfers. |  |  |  |  |  |  |  |
| M12 | Discharge planning includes clear instructions for follow-up care. |  |  |  |  |  |  |  |
| M13 | Patients are informed about their care options and wait times. |  |  |  |  |  |  |  |
| M14 | Referrals to other services are coordinated effectively. |  |  |  |  |  |  |  |
| M15 | Patient records are accessible to authorized staff during transitions. |  |  |  |  |  |  |  |
| M16 | Barriers to accessing care (e.g., language, financial) are addressed. |  |  |  |  |  |  |  |
| 1. **Patient-Centered Care (PCC)** | |  |  |  |  |  |  |  |
| M17 | Patients are involved in decisions about their care. |  |  |  |  |  |  |  |
| M18 | Patient preferences and values are respected in care planning. |  |  |  |  |  |  |  |
| M19 | Family members are included in care discussions when appropriate. |  |  |  |  |  |  |  |
| M20 | Patients receive education about their condition and treatment. |  |  |  |  |  |  |  |
| M21 | Pain management is tailored to patient needs. |  |  |  |  |  |  |  |
| M22 | Cultural and religious needs are considered in care delivery. |  |  |  |  |  |  |  |
| M23 | Patient feedback is collected and used to improve care. |  |  |  |  |  |  |  |
| 1. **Assessment of Patients (AOP)** | |  |  |  |  |  |  |  |
| M24 | Initial patient assessments are completed within 24 hours of admission. |  |  |  |  |  |  |  |
| M25 | Assessments include physical, psychological, and social needs. |  |  |  |  |  |  |  |
| M26 | Reassessments are conducted based on patient condition changes. |  |  |  |  |  |  |  |
| M27 | Diagnostic tests are ordered and reviewed promptly. |  |  |  |  |  |  |  |
| M28 | Assessment findings are documented and communicated to the care team. |  |  |  |  |  |  |  |
| 1. **Care of Patients (COP)** | |  |  |  |  |  |  |  |
| M29 | Care plans are developed based on patient assessments. |  |  |  |  |  |  |  |
| M30 | High-risk patients (e.g., those with comorbidities) receive specialized care. |  |  |  |  |  |  |  |
| M31 | Nutritional needs are assessed and addressed for all patients. |  |  |  |  |  |  |  |
| M32 | Medication reconciliation is performed during admission and discharge. |  |  |  |  |  |  |  |
| M33 | Patient monitoring is consistent with their condition. |  |  |  |  |  |  |  |
| M34 | Emergency response protocols are followed for deteriorating patients. |  |  |  |  |  |  |  |
| M35 | Care is coordinated among multidisciplinary teams. |  |  |  |  |  |  |  |
| M36 | End-of-life care is provided with dignity and respect. |  |  |  |  |  |  |  |
| 1. **Medication Management and Use (MMU)** | |  |  |  |  |  |  |  |
| M37 | Medications are stored securely and according to guidelines. |  |  |  |  |  |  |  |
| M38 | Medication administration follows the “five rights” (right patient, drug, dose, route, time). |  |  |  |  |  |  |  |
| M39 | Adverse drug events are reported and analyzed. |  |  |  |  |  |  |  |
| M40 | Patients are educated about their medications and potential side effects. |  |  |  |  |  |  |  |
| M41 | Medication errors are minimized through double-checking procedures. |  |  |  |  |  |  |  |
| M42 | Expired medications are removed from use. |  |  |  |  |  |  |  |

## **Section Two: Nursing Performance**

| **Item Number** | **Item Description** | ***7-point Likert Scale*** | | | | | | |
| --- | --- | --- | --- | --- | --- | --- | --- | --- |
| *Strongly Agree* | *Agree* | *Somewhat Agree* | *Neutral* | *Somewhat Disagree* | *Disagree* | *Strongly Disagree* |
| 7 | 6 | 5 | 4 | 3 | 2 | 1 |
| 1. **Performance Efficiency** | |  |  |  |  |  |  |  |
| Y1 | I deliver care that meets the expected standards of quality. |  |  |  |  |  |  |  |
| Y2 | I communicate effectively with patients and their families. |  |  |  |  |  |  |  |
| Y3 | I collaborate with colleagues to ensure optimal patient outcomes. |  |  |  |  |  |  |  |
| Y4 | I adapt to unexpected changes in patient conditions. |  |  |  |  |  |  |  |
| Y5 | I ensure patient safety protocols are followed during care delivery. |  |  |  |  |  |  |  |
| 1. **Performance Effectiveness** | |  |  |  |  |  |  |  |
| Y6 | I complete my assigned tasks within the allotted time. |  |  |  |  |  |  |  |
| Y7 | I manage my workload effectively during shifts. |  |  |  |  |  |  |  |
| Y8 | I prioritize patient care tasks based on urgency. |  |  |  |  |  |  |  |
| Y9 | I use hospital resources efficiently to deliver care. |  |  |  |  |  |  |  |
| 1. **Performance Indicators** | |  |  |  |  |  |  |  |
| Y10 | I contribute to reducing patient falls in my unit. |  |  |  |  |  |  |  |
| Y11 | I help prevent hospital-acquired infections (e.g., through hand hygiene). |  |  |  |  |  |  |  |
| Y12 | I ensure pressure ulcers are prevented or managed appropriately. |  |  |  |  |  |  |  |
| Y13 | I monitor and report medication errors promptly. |  |  |  |  |  |  |  |
| Y14 | I participate in initiatives to improve patient satisfaction. |  |  |  |  |  |  |  |
| Y15 | I follow protocols to reduce catheter-associated urinary tract infections. |  |  |  |  |  |  |  |
| Y16 | I ensure timely administration of medications to patients. |  |  |  |  |  |  |  |
| Y17 | I contribute to reducing patient readmission rates. |  |  |  |  |  |  |  |
| Y18 | I monitor and address patient pain levels effectively. |  |  |  |  |  |  |  |
| Y19 | I ensure proper use of restraints when necessary. |  |  |  |  |  |  |  |
| Y20 | I participate in quality improvement projects in my unit. |  |  |  |  |  |  |  |
| Y21 | I follow protocols for safe surgical procedures. |  |  |  |  |  |  |  |
| Y22 | I ensure accurate patient identification before procedures. |  |  |  |  |  |  |  |
| Y23 | I contribute to reducing ventilator-associated pneumonia. |  |  |  |  |  |  |  |
| Y24 | I maintain a safe environment for patients and staff. |  |  |  |  |  |  |  |

**Note:** This is an English translation of the Arabic questionnaire used in this study. The original Arabic version of the questionnaire is available upon request.
